# Supplementary material
Source: publisher figshare collection journal article supplement (https://acs.figshare.com/ndownloader/files/4745716)
Supplement: Supplementary file 1 [file 4745716]

## *Supporting Information for*

# “Synthesis of Cyclolinear Poly(carbosilane)-g-Poly(methylmethacrylate or styrene) Random Copolymers”

Jaeyong Hyun, Junwon Han, Chang Y. Ryu\* and Leonard V. Interrante\*

Department of Chemistry and Chemical Biology, New York State Center for Polymer Synthesis,

Rensselaer Polytechnic Institute, Troy, New York 12180-3590

[interl@rpi.edu](mailto:interl@rpi.edu)

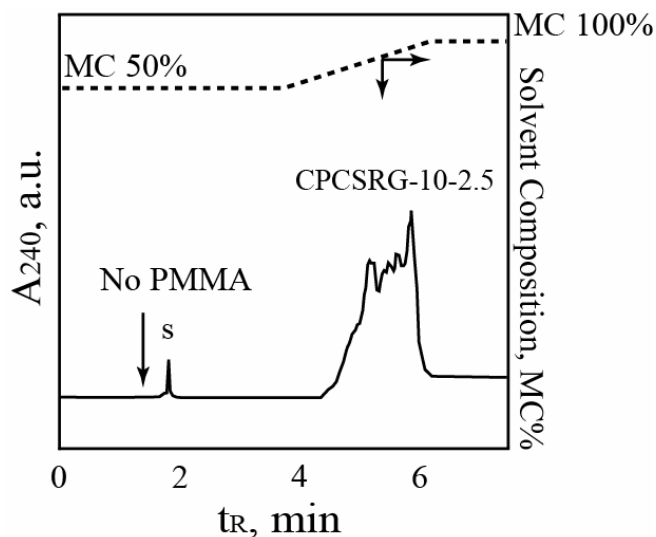

**Figure S1.** TADIC after remove excess of PMMA (2.5K) homopolymer from graft copolymer (CPCSRG-10-2.5) with cold methanol showing the absence of PMMA homopolymer (s:solvent).

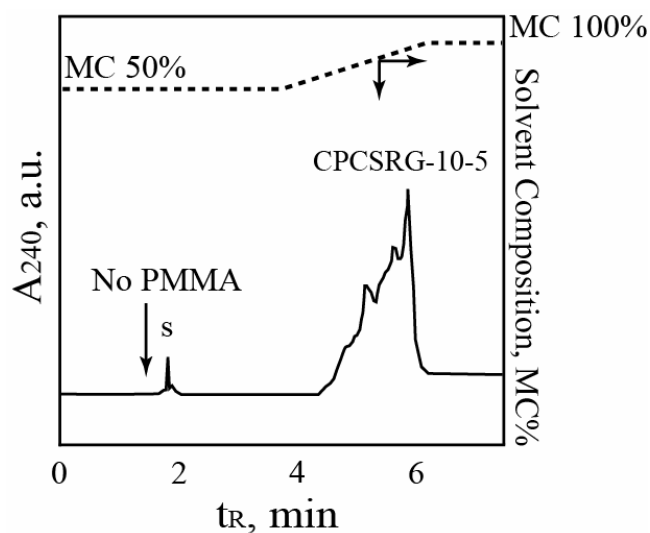

**Figure S2.** TADIC after remove excess of PMMA (5K) homopolymer from graft copolymer (CPCS RG-10-5) with hot methanol showing the absence of PMMA homopolymer (s:solvent).

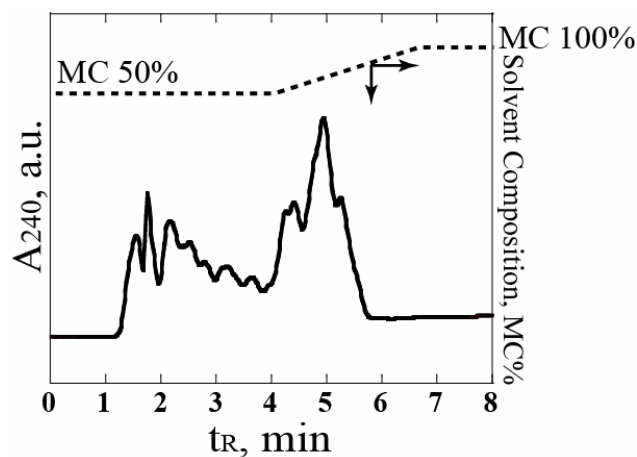

**Figure S3.** TADIC of poly(HDTDSCB)-g-PMMA copolymer after coupling reaction at 0 °C showing many peaks appeared at the 1.5~4 min retention time region, which means changing of chemical backbone structure of poly(HDTDSCB) by side reaction such as ring opening and/or crosslinking. In the case of the poly(HDTDSCB)-g-PMMA copolymer prepared at -78 °C, no peaks were observed in the 2~4 min retention time region, which along with the lack of the  $^1\text{H}$ -NMR peaks near 0.1 ppm, provides good evidence for a clean coupling reaction, without attendant ring-opening.
